# Supplementary material for: Efficacy of a Text Message-Delivered Extended Contact Intervention on Maintenance of Weight Loss, Physical Activity, and Dietary Behavior Change
Source: PubMed Central journal article supplement (PMC4705007; doi:10.2196/mhealth.4114), 2015-09-15
Supplement: mhealth_v3i3e88_app1.pdf [file mhealth_v3i3e88_app1.pdf]

Multimedia Appendix 1. Mean changes in weight, physical activity, and diet from baseline (BL) to 6-months (6M), 12-months (12M) and 18-months (18M) follow-up.

|                        |                          | <b>Weight<br/>(kg)</b> | <b>MVPA<br/>(mins/day)</b> | <b>Energy intake<br/>(kJ/day)</b> |
|------------------------|--------------------------|------------------------|----------------------------|-----------------------------------|
| Baseline               | <b>Mean<br/>±SD</b>      | 81.7 ± 13.1            | 27.3 ± 18.8                | 7862 ± 1982                       |
| 6MΔ <sup>a</sup>       | <b>Mean<br/>(95% CI)</b> | -5.5<br>(-7.2, -3.8)   | 8.7<br>(2.6, 14.8)         | -1197<br>(-1768, -626)            |
|                        | <b>p</b>                 | <0.001                 | 0.006                      | <0.001                            |
| 12 MΔ <sup>a</sup>     | <b>Mean<br/>(95% CI)</b> | -4.2<br>(-5.9, -2.5)   | 2.6<br>(-3.9, 9.2)         | -833<br>(-1452, -214)             |
|                        | <b>p</b>                 | <0.001                 | 0.423                      | 0.009                             |
| 18 MΔ <sup>a</sup>     | <b>Mean<br/>(95% CI)</b> | -4.2<br>(-6.0, -2.4)   | 10.4<br>(3.6, 17.2)        | -417<br>(-1067, 233)              |
|                        | <b>p</b>                 | <0.001                 | 0.003                      | 0.200                             |
| 12MΔ-6MΔ <sup>b</sup>  | <b>Mean<br/>(95% CI)</b> | 1.3<br>(-0.5, 3.1)     | -6.1<br>(-14.9, 2.8)       | 364<br>(-610, 1338)               |
|                        | <b>p</b>                 | 0.211                  | 0.260                      | 0.735                             |
| 18MΔ-12MΔ <sup>b</sup> | <b>Mean<br/>(95% CI)</b> | -0.0<br>(-1.9, 1.8)    | 7.8<br>(-1.6, 17.2)        | 416<br>(-620, 1452)               |
|                        | <b>p</b>                 | 1.000                  | 0.132                      | 0.690                             |
| 18MΔ-6MΔ <sup>b</sup>  | <b>Mean<br/>(95% CI)</b> | 1.3<br>(-0.5, 3.1)     | 1.7<br>(-7.5, 10.9)        | 780<br>(-223, 1784)               |
|                        | <b>p</b>                 | 0.242                  | 0.957                      | 0.170                             |

**Footnote:** Analyses carried out under intention-to-treat principles for all participants at baseline and 6-months, and then completers from this sample at 12- and 18-months [BL=29; 6M=29; 12M=25; 18M =23]

<sup>a</sup> Mean changes from baseline, estimated from mixed models, adjusted for baseline values, age, income, time since diagnosis, and chemotherapy treatment <sup>b</sup> Differences in change between follow-up time points, estimated from mixed models, adjusted for baseline values, age, income, time since diagnosis, and chemotherapy treatment
